1 **ARTICLE**

2

3 **Deep learning-based adaptive detection of fetal nucleated red blood**  
4 **cells**

5

6 Chao Sun<sup>1#</sup>, Ruijie Wang<sup>2#</sup>, Lanbo Zhao<sup>1</sup>, Lu Han<sup>1</sup>, Sijia Ma<sup>1</sup>, Dongxin Liang<sup>1</sup>, Lei  
7 Wang<sup>1</sup>, Xiaoqian Tuo<sup>1</sup>, Dexing Zhong<sup>2\*</sup> & Qiling Li<sup>1\*</sup>

8

9 <sup>1</sup>Department of Obstetrics and Gynecology, The First Affiliated Hospital of Xi'an  
10 Jiaotong University, Xi'an 710061, China. <sup>2</sup>School of Electronic and Information  
11 Engineering, Xi'an Jiaotong University, Xi'an 710049, China. \*email:  
12 liqiling@mail.xjtu.edu.cn; bell@xjtu.edu.cn

13

14 <sup>#</sup>Chao Sun and Ruijie Wang contributed equally to this work.

15 **Abstract**

16 **Aim:** this study, we established an artificial intelligence system for rapid  
17 identification of fetal nucleated red blood cells (fNRBCs).

18 **Method:** Density gradient centrifugation and magnetic-activated cell sorting were  
19 used for the separation of fNRBCs from umbilical cord blood. The cell block  
20 technique was used for fixation. We proposed a novel preprocessing method based on  
21 imaging characteristics of fNRBCs for region of interest (ROI) extraction, which  
22 automatically segmented individual cells in peripheral blood cell smears. The  
23 discriminant information from ROIs was encoded into a feature vector and  
24 pathological diagnosis were provided by the prediction network.

25 **Results:** Four umbilical cord blood samples were collected and validated based on a  
26 large dataset containing 260 samples. Finally, the dataset was classified into 3,720 and  
27 1,040 slides for training and testing, respectively. In the test set, classifier obtained  
28 98.5% accuracy and 96.5% sensitivity.

29 **Conclusion:** Therefore, this study offers an effective and accurate method for  
30 fNRBCs preservation and identification.

31 **Keywords:** fetal nucleated red blood cells, cell-block, deep learning, non-invasive  
32 prenatal diagnosis

### 33 **Introduction**

34 The clinical application of fNRBCs during pregnancy could be classified into two  
35 main categories<sup>1,2</sup>. One is the prognosis of possible diseases in pregnant women by  
36 counting fNRBCs in umbilical cord blood. Chronic tissue hypoxia results in increased  
37 levels of erythropoietin, which, in turn, leads to stimulation of erythropoiesis and  
38 increased numbers of circulating nucleated red blood cells (NRBCs)<sup>1,3-5</sup>. Increased  
39 umbilical cord levels of erythropoietin have been reported in pregnancies complicated  
40 by intrauterine growth restriction, maternal hypertension, preeclampsia, maternal  
41 smoking, Rh isoimmunization, and maternal diabetes<sup>5-8</sup>. As expected, each of these  
42 conditions has been associated with increased NRBCs in the newborn<sup>9</sup>. The other  
43 objective is to screen and extract fNRBCs from maternal peripheral blood for  
44 non-invasive prenatal diagnosis (NIPD)<sup>10-12</sup>. The choice of fNRBCs as ideal target  
45 cells is based on the following parameters<sup>13,14</sup>: (1) presence of intact nuclei containing  
46 the complete fetal genome in fNRBCs, which is a prerequisite for prenatal analysis; (2)  
47 limited life span of fNRBCs in the maternal circulation, which can be differentiated  
48 morphologically from maternal cells; and (3) presence of distinct cell markers, such  
49 as epsilon hemoglobin transferrin receptor (CD71)<sup>15</sup>, thrombospondin receptor  
50 (CD36), and glycophorin A (GPA) in fNRBCs that enable isolation of these rare cells  
51 from large volumes of maternal blood.

52 As a result, great attention and research efforts have been devoted to the  
53 development of NIPD methods based on circulating fNRBCs. However, the detection  
54 of fNRBCs is challenging due to their extremely low concentration against a  
55 background predominance of maternal cells (<6 cells per mL; with 109 maternal  
56 cells)<sup>16,17</sup>. Several fNRBC enrichment methods based on different principles have  
57 been reported, such as density gradient centrifugation (DGC)<sup>13,18</sup>,  
58 fluorescence-activated cell sorting (FACS)<sup>19</sup>, and magnetic-activated cell sorting  
59 (MACS)<sup>20</sup>, dielectrophoresis, and microfluidics based technologies<sup>21,22</sup>. Nevertheless,  
60 long-term preservation of samples and rapid identification of target cells (fNRBCs)  
61 still present considerable challenges.

62 Since the identification of fNRBCs in large number of cell block slices represent a  
63 huge manual burden on pathologists, this field could benefit greatly from an urgent  
64 digital revolution<sup>23</sup>. In recent years, the development of computer-aided diagnosis and  
65 medical image processing has resulted in emergence of the field of computational  
66 pathology<sup>24</sup>. Techniques based on the combination of deep learning and multi-medical

67 specialties has rapidly gained popularity and led to substantial progress in fields such  
68 as radiology, ophthalmology, and breast cancer<sup>25-27</sup>. DL-based algorithms have  
69 demonstrated remarkable progress in image recognition tasks, in which convolution  
70 neural network (CNN) models, as the most prevalent type of deep learning structure,  
71 has been reported to surpass human performance<sup>28</sup>, and has become a widely used  
72 methodology for analysis in medical imaging<sup>29</sup>.

73 There are two purposes to the present study. The first is to explore methods suitable  
74 for the long-term preservation of fNRBCs. The cell block technique for fixation of  
75 fNRBC samples is first introduced. The other objective centers on the establishment  
76 of a system based artificial intelligence (AI) to apply supervised learning for the  
77 analysis of fNRBC image. Training and validating the CNN model on large-scale data  
78 sets is crucial for enhancing the efficiency and accuracy of the model. The fNRBC  
79 images were segmented before training, to correct for overestimations. Since it is  
80 impossible to rely on expensive and time-consuming manual annotations, we propose  
81 a novel adaptive automated region of interest (ROI) extraction algorithm that does not  
82 require manual pixel-level annotations. We expect this method to be capable of rapid  
83 identification of specific (target) cells in backgrounds cluttered with a large number of  
84 maternal peripheral blood, and therefore, to confer simplicity and feasibility to NIPD  
85 techniques.

## 86 **Materials and Methods**

87 **Ethics statement.** This study was approval (XJTU1AF-CRS-2015-001) by the Ethics  
88 Committee of the First Affiliated Hospital of Xi'an Jiaotong University. Related  
89 informed consent was obtained from the subjects before the study, and all the  
90 protocols used were in compliance with the ethical principles for research that  
91 involves human subjects of the Helsinki Declaration for medical research<sup>30</sup>.

92 **Cord blood samples.** All umbilical cord blood samples were collected from normal  
93 term deliveries ( $\geq 36$  weeks). Approximately 9 mL of cord blood from gravidas  
94 chosen for this study was collected into anti-coagulant K2-EDTA tubes (BD  
95 Vacutainer 366643) containing a proprietary preservative.

96 **fNRBC enrichment.** Blood samples were processed within 2 hours of collection and  
97 mononuclear cells were isolated by density gradient centrifugation with  
98 Histopaque-1077 (Sigma Chemical, St. Louis, MO, USA), magnetically labelled with  
99 anti-CD71 monoclonal antibody (Miltenyi Biotec, Germany), and positively selected  
100 by MACS (Miltenyi, Biotec, Germany) according to the protocol provided by the  
101 manufacturer.

102 **fNRBC fixation by cell-block technique.** The fNRBC samples were centrifuged at  
103 2000 rpm at normal temperature for 10 min, the supernatant was removed, and the  
104 cell-rich layer was collected. Then, the temperature was increased to 40 °C, and the  
105 cell-rich layer was absorbed. The samples were transferred to the bottom of the  
106 diluted solution (Xi'an Meijiajia, China), loaded into the Li-Shi Thin Prep  
107 Liquid-based Cytology and Tissue Embedding Machine (Xi'an Meijiajia, China), and  
108 removed after centrifugation at 2000 rpm for 10 min. The samples stood at room  
109 temperature (or in a refrigerated room) for 10 min, and were taken out when  
110 completely solid. The part without the cell-rich layer were cut off and stored in the  
111 embedding box.

112 **HE staining.** Cells were stained with HE staining according to routine protocols<sup>31</sup>.  
113 Briefly, after deparaffinization and rehydration, 5  $\mu$ m longitudinal sections were  
114 stained with hematoxylin solution for 3–5 min followed by 5 dips in 1% acid ethanol  
115 (1% HCl in 70% ethanol) and rinsed in distilled water. Then, the sections were stained  
116 with eosin solution for 5 min, followed by dehydration with graded alcohol and  
117 cleaning in xylene. The mounted slides were then imaged using an Olympus BX53  
118 fluorescence microscope (Olympus, Tokyo, Japan). NRBCs were identified by

119 morphology and counted under a light microscope at 400× magnification. Cells were  
120 considered as NRBCs if they met the following criteria: diameter was intermediate to  
121 that of neutrophils and leukocytes; low nucleus-to-cytoplasm ratio; small, dense,  
122 round nucleus; and orthochromatic non-granular cytoplasm.

123 **Image acquisition and processing.** After HE staining, the sections of maternal  
124 umbilical cord blood were scanned by a Pathological Section Scanner (Leica SCN  
125 400, Germany). fNRBCs were selected as positive targets, and lymphocytes and  
126 neutrophils as negative control targets. The average initial slice size used for ROI  
127 extraction was  $1,651 \times 1,209$  pixels.

128 **Cellular-level ROI extraction.** A semi-automated ROI extraction algorithm based on  
129 global threshold segmentation and watershed algorithm was proposed<sup>32</sup>.

130 First, a Gaussian low-pass filter was applied for image pre-processing. To reduce the  
131 complexity of ROI extraction, adaptive thresholding methods and mathematical  
132 morphology operations were used to segment fNRBCs. Since the HE staining of each  
133 fNRBC image was uneven and could fade over time, the adaptive threshold  $T$  was  
134 calculated by the following formula:

$$135 \quad T = \frac{locs(x) + (256 - locs(x))}{3.06}$$

136 where, the first extreme point on the histogram of the grayscale distribution is denoted  
137 as  $locs$ , and  $locs(x)$  represents the corresponding abscissa.

138 Since the global threshold algorithm could not distinguish adjacent cells, we chose  
139 the watershed algorithm to detect the single fNRBC. Considering the information in  
140 the grayscale image, an improved watershed method based on adaptive thresholding  
141 was proposed. First, information on the image gradient was used as prior knowledge,  
142 and the watershed algorithm was rendered sensitive to the small extreme line  
143 response<sup>33</sup>. Then, the mathematical morphology technique was used to remove cell  
144 debris, and over-segmentation was eliminated by bottleneck detection. These steps  
145 could reduce the classification burden of the neural network, thereby decreasing the  
146 calculation workload. By using effective and robust cellular-level ROI extraction  
147 methods, we acquired an accurate cell contour at different magnifications. The  
148 experimental results were shown as Figure 1A.

149 **Prediction network.** We proposed a skillfully-designed network structure p-net to  
150 perform classification tasks for fNRBC images. The core of building p-net was to  
151 choose the appropriate CNN structure (Supplementary Figure 1) and loss function.

152 VGG-16 had been proven to be successful in the field of medical imaging due to its  
153 excellent image feature extraction capabilities. In VGG-16, each input in the layer  
154 was linear with the output of the previous layer, resulting in a final output that was a  
155 linear representation of the original input. Due to the limitations of linear expression,  
156 many features of the original input couldnot be preserved. We needed to combine the  
157 data of the input image to generate more features of the image, which would confer  
158 greater stability and efficiency to the network. We chose the rectified linear unit  
159 (ReLU) function as the activation function.

160 The p-net was composed of four blocks of convolutional layers, and the final fully  
161 connected layers were replaced with a global average pooling layer<sup>34</sup>. Since the size  
162 of the ROI patches, an important feature of fNRBCs, was different, we filled the  
163 pixels around the ROI patches such that dimensions of  $120 \times 120 \times 3$  were achieved,  
164 and used these as the input for the network.

165 The maximum pooling function was chosen as the pooling function to reduce the  
166 amount of calculation. Through the training of 10,000 samples, a p-net was fine-tuned  
167 on domain-specific dataset. The prediction network framework used in this study was  
168 shown in Figure 1B.

169 **System verification and immunocytochemistry for HbF.** HbF was a specific  
170 protein found in fNRBCs, which did not exist in maternal erythrocytes and other  
171 nucleated cells<sup>35</sup>. Therefore, it could be used as a marker for fNRBC detection. After  
172 the establishment of the AI system, some HE sections were selected for system  
173 verification, and all positive recognitions were subsequently confirmed by  
174 immunocytochemical staining.

175 Immunocytochemistry studies were performed on 5- $\mu$ m sections of formalin-fixed,  
176 paraffin-embedded tissues. Slides were first deparaffinized and rehydrated. Antigen  
177 retrieval was carried out with 0.01 M citrate buffer at pH 6.0. Slides were heated in a  
178 770-W microwave oven for 16 min, cooled to room temper ature, and rinsed in PBS  
179 buffer (pH 7.4). The slides were incubated with a 3% hydrogen peroxide solution  
180 (hydrogen peroxide: pure water = 1:9) at room temperature in dark for 25 min,  
181 followed by washing with PBS buffer (pH 7.4). This step was to block endogenous  
182 nonspecific proteins and peroxidase activity. The sections were incubated at 4 °C  
183 overnight with HbF (BIOSS, bs-16469r) at a 1:100 ratio (mol). Following a PBS  
184 buffer wash, sections were incubated with the HRP-conjugated goat anti-rabbit IgG  
185 (G23303, Servicebio, China) at a 1:200 ratio (mol). The sections were then washed

186 and treated with a solution of diaminobenzidine and hydrogen peroxide for 10 min to  
187 produce the visible brown pigment. After rinsing, a toning solution (DAB Enhancer,  
188 Dako) was used for 2 min to enrich the final color. The sections were counterstained  
189 with hematoxylin, dehydrated, and mounted on cover slips with permanent media.



190 **Results**

191 **Baseline characteristics.** This prospective case-control study was conducted at the  
192 First Affiliated Hospital of Xi'an Jiaotong University. The study included 4 pregnant  
193 women, who delivered a single mature neonate. Table 1 listed the demographic data  
194 of these subjects.

195 **Hematoxylin-eosin (HE) staining of fNRBCs.** fNRBCs were detected in the  
196 maternal umbilical cord blood. Most fNRBCs were observed to be polychromatic and  
197 orthochromatic normoblasts, which was in accordance with the histological features  
198 expected of normoblasts (Figure 2A). The single nucleated cell shown by the arrow in  
199 Figure 2A represented an fNRBC.

200 **Hemoglobin F(HbF) immunocytochemical staining of fNRBCs.** Blood samples  
201 from all 4 patients contained HbF-positive cells. The nuclei were blue stained, while  
202 the cytoplasm was not stained (Figure 2B). The single nucleated cell shown by the  
203 arrow in Figure 2B represented an fNRBC.

204 **HE and HbF immunocytochemical staining in serial sections.** Eight serial sections  
205 (4  $\mu$ m) were made from each specimen. HE and HbF immunocytochemical staining  
206 were performed on odd and even numbered sections, respectively. fNRBCs in the  
207 same field of vision were identified based on their distinct morphologies, as observed  
208 by HE staining. This was further confirmed by the HbF immunocytochemical staining  
209 (Figure 2C, 2D).

210 **Intelligent identification.** We validated the CNN model on a large dataset containing  
211 260 samples, with average slide dimensions of  $1,651 \times 1,209$  pixels (height  $\times$  width).  
212 The total number of positive and negative samples was similar. The training set and  
213 test set was randomly split in a 7:3 ratio, based on the original data. Taking the small  
214 sample size into account, through data augmentation technology, the original image  
215 was flipped to obtain a mirror image, which was rotated by  $90^\circ$ ,  $180^\circ$ , and  $270^\circ$ ,  
216 respectively, thereby expanding the original data set by 8 times. Then, the data set was  
217 split into 3,720 and 1,040 slides for training and testing, respectively.

218 P-net was an end-to-end trainable network, where an image was the input and the  
219 result of the threshold operation (a number) represents the output. When the output  
220 was close to 1, the sample had a high probability of being positive. Conversely, an  
221 output value close to 0 indicates that the sample may belong to the negative group.  
222 Since we were more interested in the positive samples with respect to the

223 classification imbalance problem, we chose the precision-recall curve to evaluate the  
224 efficiency of the p-net and traditional CNN networks used in this study (Figure 3).  
225 Here, Net1 represented a traditional CNN network, while Net2 referred to the network  
226 proposed here.

227 The details of the scheme optimization were shown in Table 2. Finally, on the  
228 premise of 100% accuracy in the training set, the test set was observed to attain 96.5%  
229 sensitivity, 100% specificity, and 98.5% accuracy.

230 **Discussion**

231 Prenatal testing based on cell-free DNA (cfDNA) in the maternal plasma has been  
232 defined as non-invasive prenatal testing (NIPT) to distinguish it from traditional  
233 invasive diagnostic methods such as amniocentesis or chorionic villus sampling<sup>36</sup>. As  
234 an excellent screening method deemed acceptable for aneuploidy detection, there are  
235 a number of different NIPT platforms, such as massively parallel sequencing, single  
236 nucleotide polymorphism, and chromosome-selective sequencing<sup>37</sup>. However, NIPT  
237 by itself cannot provide accuracy diagnostics for aneuploidy, and therefore, the  
238 karyotyping must be confirmed before or after delivery. Some cfDNA-based  
239 techniques called NIPD can provide accurate fetal diagnostic information (thereby  
240 offsetting the requirement subsequent confirmation with invasive testing) including  
241 fetal sex, rhesus D genotyping, and monogenic disorders<sup>36</sup>. Innovative applications of  
242 NIPD, such as digital polymerase chain reaction and next-generation sequencing,  
243 have the capability to read more information from cfDNA. Even so, the information  
244 cfDNA provides is not as extensive and detailed as that obtained by invasive  
245 methods<sup>38</sup>. Meanwhile, there are many challenges in developing NIPD/T services, the  
246 most important of which is the content of cfDNA<sup>39</sup>. The latter depends on fetal  
247 fraction, and is affected by a variety of factors like gestational age and maternal  
248 weight<sup>40</sup>.

249 Each fetal cell contains all the genetic information of the individual. Therefore,  
250 recent studies on NIPD have focused on whole genome sequencing and short tandem  
251 repeat identification of fNRBCs and circulating trophoblasts. On the contrary, the  
252 rapid selection and separation of target cells still pose considerable challenges to this  
253 application<sup>41</sup>. In this study, we report a more effective method for the long-term  
254 preservation of fNRBCs. In addition, we have established an AI-based system for the  
255 rapid identification of fNRBCs.

256 Cell block preparations have been used as a complementary technique for  
257 increasing diagnostic accuracy in many fields<sup>42</sup>, such as endometrial cytology,  
258 malignant pleural effusion, and needle aspiration cytology of thyroid gland<sup>43,44</sup>. In this  
259 study, we first proposed a cell block technique for fixation of fNRBC samples. This  
260 technique could ensure a uniform distribution of the enriched fNRBCs in the wax  
261 block, which is convenient for the identification and isolation of individual fetal cells  
262 at a later stage. In addition, the cell slices generated by this technique have no  
263 background interference to subsequent immunohistochemistry, fluorescent in situ

264 hybridization, and other molecular pathology assays. fNRBCs are the best target cells  
265 for NIPD based on cell block technique. Our method (Cell-Block technique) can not  
266 only preserve fNRBCs for a long time, but also facilitate repeated tests using the same  
267 sample.

268 fNRBCs exhibit unique cytological characteristics on HE staining. The nucleus is  
269 dense and massive, with the ratio of nucleus to cytoplasm being less than 1/2. There  
270 are no granules in the cytoplasm<sup>45</sup>, which is positive stained. Therefore, we used the  
271 traditional density gradient centrifugation and MACS (anti-CD71) method to separate  
272 fNRBCs from maternal cord blood, and chose conventional HE staining slices for the  
273 network-side input. To ensure accurate diagnosis, both HE staining and  
274 immunocytochemistry of HbF were used for dual recognition in system verification.

275 Due to the small number of fNRBCs in maternal peripheral blood, it is not enough  
276 for the initial stage of the AI system establishment. In this study, umbilical cord blood  
277 of pregnant women was selected as the sample for both input and verification.

278 Moreover, we introduced artificial intelligence technologies and expect this system  
279 to quickly and easily identify fNRBCs in the background predominance of maternal  
280 cells. To reduce the complexity in the image classification algorithm, we proposed an  
281 adaptive ROI extraction method for fNRBC images. In addition, we have  
282 comprehensively utilized the visual information perceived by the network and  
283 constructed a novel pathological recognition network, which would have significant  
284 contributions in improving the means and methods of non-invasive medical  
285 diagnostics.

286 In general, this report on an AI system of fNRBC identification lays the foundation  
287 for subsequent cell collection, sequencing, and prenatal diagnosis. In future, we would  
288 conduct further investigations on maternal peripheral blood, and continue to optimize  
289 the system, such that it can be devoted to fNRBC detection in NIPD.

## 290 References

- 291 1. Kil TH, Han JY, Kim JB, et al. A study on the measurement of the nucleated red blood cell  
292 (nRBC) count based on birth weight and its correlation with perinatal prognosis in infants  
293 with very low birth weights. *Korean J Pediatr.* Feb 2011;54(2):69-78.
- 294 2. Krajewski P, Welfel E, Kalinka J, Pokrzywnicka M, Kwiatkowska M. [Evaluation of the  
295 relationship between circulating nucleated red blood cells count and inborn infection in  
296 neonates]. *Ginekol Pol.* Jan 2008;79(1):17-22.
- 297 3. Li J, Kobata K, Kamei Y, et al. Nucleated red blood cell counts: an early predictor of brain  
298 injury and 2-year outcome in neonates with hypoxic-ischemic encephalopathy in the era of  
299 cooling-based treatment. *Brain Dev.* Jun 2014;36(6):472-478.
- 300 4. Masoudi Z, Akbarzadeh M, Vaziri F, Zare N, Ramzi M. The effects of decreasing maternal  
301 anxiety on fetal oxygenation and nucleated red blood cells count in the cord blood. *Iran J*  
302 *Pediatr.* Jun 2014;24(3):285-292.
- 303 5. Boskabadi H, Zakerihamidi M, Sadeghian MH, Avan A, Ghayour-Mobarhan M, Ferns GA.  
304 Nucleated red blood cells count as a prognostic biomarker in predicting the complications of  
305 asphyxia in neonates. *J Matern Fetal Neonatal Med.* Nov 2017;30(21):2551-2556.
- 306 6. Constantino BT, Rivera GK. Cutoff Value for Correcting White Blood Cell Count for Nucleated  
307 Red Blood Cells: What is it? Why is it Important? *Lab Med.* Oct 10 2019;50(4):e82-e90.
- 308 7. Davari-Tanha F, Kaveh M, Nemati S, Javadian P, Salmanian B. Nucleated red blood cells count  
309 in pregnancies with idiopathic intra-uterine growth restriction. *J Family Reprod Health.* Jun  
310 2014;8(2):77-81.
- 311 8. Walsh BH, Boylan GB, Dempsey EM, Murray DM. Association of nucleated red blood cells and  
312 severity of encephalopathy in normothermic and hypothermic infants. *Acta Paediatr.* Feb  
313 2013;102(2):e64-67.
- 314 9. Gasparovic VE, Ahmetasevic SG, Colic A. Nucleated red blood cells count as first prognostic  
315 marker for adverse neonatal outcome in severe preeclamptic pregnancies. *Coll Antropol.* Sep  
316 2012;36(3):853-857.
- 317 10. Breman AM, Chow JC, U'Ren L, et al. Evidence for feasibility of fetal trophoblastic cell-based  
318 noninvasive prenatal testing. *Prenat Diagn.* Nov 2016;36(11):1009-1019.
- 319 11. Wei X, Ao Z, Cheng L, et al. Highly sensitive and rapid isolation of fetal nucleated red blood  
320 cells with microbead-based selective sedimentation for non-invasive prenatal diagnostics.  
321 *Nanotechnology.* Oct 26 2018;29(43):434001.
- 322 12. Feng C, He Z, Cai B, et al. Non-invasive Prenatal Diagnosis of Chromosomal Aneuploidies and  
323 Microdeletion Syndrome Using Fetal Nucleated Red Blood Cells Isolated by Nanostructure  
324 Microchips. *Theranostics.* 2018;8(5):1301-1311.
- 325 13. Mavrou A, Kouvidi E, Antsaklis A, Souka A, Kitsiou Tzeli S, Kolialexi A. Identification of  
326 nucleated red blood cells in maternal circulation: a second step in screening for fetal  
327 aneuploidies and pregnancy complications. *Prenat Diagn.* Feb 2007;27(2):150-153.
- 328 14. Redline RW. Elevated circulating fetal nucleated red blood cells and placental pathology in  
329 term infants who develop cerebral palsy. *Hum Pathol.* Sep 2008;39(9):1378-1384.
- 330 15. Tao D, Shen Y, Feng X, Chen H. The application of CD71 and Hoechst33258 to staining method  
331 for sorting fetal nucleated red blood cells in the peripheral blood of pregnant women.  
332 *Zhonghua Yi Xue Yi Chuan Xue Za Zhi.* Oct 2000;17(5):352-354.
- 333 16. Xiaoyan X, Hanping C. Fetal nucleated red blood cells in maternal peripheral blood and

- 334 gestational age. *Int J Gynaecol Obstet*. Nov 2004;87(2):143-144.
- 335 17. Kuo PL. Frequencies of fetal nucleated red blood cells in maternal blood during different  
336 stages of gestation. *Fetal Diagn Ther*. Nov-Dec 1998;13(6):375-379.
- 337 18. Kovalak EE, Dede FS, Gelisen O, Dede H, Haberal A. Nonreassuring fetal heart rate patterns  
338 and nucleated red blood cells in term neonates. *Arch Gynecol Obstet*. May  
339 2011;283(5):1005-1009.
- 340 19. Sohda S, Arinami T, Hamada H, Nakauchi H, Hamaguchi H, Kubo T. The proportion of fetal  
341 nucleated red blood cells in maternal blood: estimation by FACS analysis. *Prenat Diagn*. Aug  
342 1997;17(8):743-752.
- 343 20. Ganshirt D, Smeets FW, Dohr A, et al. Enrichment of fetal nucleated red blood cells from the  
344 maternal circulation for prenatal diagnosis: experiences with triple density gradient and  
345 MACS based on more than 600 cases. *Fetal Diagn Ther*. Sep-Oct 1998;13(5):276-286.
- 346 21. Zhang H, Yang Y, Li X, et al. Frequency-enhanced transferrin receptor antibody-labelled  
347 microfluidic chip (FETAL-Chip) enables efficient enrichment of circulating nucleated red blood  
348 cells for non-invasive prenatal diagnosis. *Lab Chip*. Sep 11 2018;18(18):2749-2756.
- 349 22. Ma GC, Lin WH, Huang CE, et al. A Silicon-based Coral-like Nanostructured Microfluidics to  
350 Isolate Rare Cells in Human Circulation: Validation by SK-BR-3 Cancer Cell Line and Its Utility  
351 in Circulating Fetal Nucleated Red Blood Cells. *Micromachines (Basel)*. Feb 17 2019;10(2).
- 352 23. Hajdu SI. A note from history: microscopic contributions of pioneer pathologists. *Ann Clin Lab  
353 Sci*. Spring 2011;41(2):201-206.
- 354 24. Fuchs TJ, Wild PJ, Moch H, Buhmann JM. Computational pathology analysis of tissue  
355 microarrays predicts survival of renal clear cell carcinoma patients. *Med Image Comput  
356 Comput Assist Interv*. 2008;11(Pt 2):1-8.
- 357 25. Hosny A, Parmar C, Quackenbush J, Schwartz LH, Aerts H. Artificial intelligence in radiology.  
358 *Nat Rev Cancer*. Aug 2018;18(8):500-510.
- 359 26. Schmidt-Erfurth U, Sadeghipour A, Gerendas BS, Waldstein SM, Bogunovic H. Artificial  
360 intelligence in retina. *Prog Retin Eye Res*. Nov 2018;67:1-29.
- 361 27. Zhou LQ, Wu XL, Huang SY, et al. Lymph Node Metastasis Prediction from Primary Breast  
362 Cancer US Images Using Deep Learning. *Radiology*. Nov 19 2019:190372.
- 363 28. He K, Zhang X, Ren S, Jian S. Deep Residual Learning for Image Recognition. Paper presented  
364 at: 2016 IEEE Conference on Computer Vision and Pattern Recognition (CVPR)2016.
- 365 29. Litjens G, Kooi T, Bejnordi BE, et al. A survey on deep learning in medical image analysis. *Med  
366 Image Anal*. Dec 2017;42:60-88.
- 367 30. Issue Information-Declaration of Helsinki. *J Bone Miner Res*. Jun 2018;33(6):BM i-BM ii.
- 368 31. Serafini S, Santos MM, Aoun Tannuri AC, et al. Is hematoxylin-eosin staining in rectal mucosal  
369 and submucosal biopsies still useful for the diagnosis of Hirschsprung disease? *Diagn Pathol*.  
370 Dec 6 2017;12(1):84.
- 371 32. Khan AUM, Torelli A, Wolf I, Gretz N. AutoCellSeg: robust automatic colony forming unit  
372 (CFU)/cell analysis using adaptive image segmentation and easy-to-use post-editing  
373 techniques. 2018;8(1).
- 374 33. Ma H, Beiter R, Gaultier A, Acton ST, Lin Z. OSLO: Automatic Cell Counting and Segmentation  
375 for Oligodendrocyte Progenitor Cells. Paper presented at: IEEE International Conference on  
376 Image Processing (ICIP)2018.
- 377 34. Esteva A, Kuprel B, Novoa RA, et al. Dermatologist-level classification of skin cancer with deep

- 378 neural networks. *Nature*. Feb 2 2017;542(7639):115-118.
- 379 **35.** Mavrou A, Kolialexi A, Antsaklis A, Korantzis A, Metaxotou C. Identification of fetal nucleated  
380 red blood cells in the maternal circulation during pregnancy using anti-hemoglobin-epsilon  
381 antibody. *Fetal Diagn Ther*. Sep-Oct 2003;18(5):309-313.
- 382 **36.** Skrzypek H, Hui L. Noninvasive prenatal testing for fetal aneuploidy and single gene disorders.  
383 *Best Pract Res Clin Obstet Gynaecol*. Jul 2017;42:26-38.
- 384 **37.** Taylor-Phillips S, Freeman K, Geppert J, et al. Accuracy of non-invasive prenatal testing using  
385 cell-free DNA for detection of Down, Edwards and Patau syndromes: a systematic review and  
386 meta-analysis. *BMJ Open*. Jan 18 2016;6(1):e010002.
- 387 **38.** Breveglieri G, D'Aversa E, Finotti A, Borgatti M. Non-invasive Prenatal Testing Using Fetal DNA.  
388 *Mol Diagn Ther*. Apr 2019;23(2):291-299.
- 389 **39.** Jenkins LA, Deans ZC, Lewis C, Allen S. Delivering an accredited non-invasive prenatal  
390 diagnosis service for monogenic disorders and recommendations for best practice. *Prenat*  
391 *Diagn*. Jan 2018;38(1):44-51.
- 392 **40.** Kinnings SL, Geis JA, Almasri E, et al. Factors affecting levels of circulating cell-free fetal DNA  
393 in maternal plasma and their implications for noninvasive prenatal testing. *Prenat Diagn*. Aug  
394 2015;35(8):816-822.
- 395 **41.** Pin-Jung C, Pai-Chi T, Zhu Y, et al. Noninvasive Prenatal Diagnostics: Recent Developments  
396 Using Circulating Fetal Nucleated Cells. *Curr Obstet Gynecol Rep*. Mar 2019;8(1):1-8.
- 397 **42.** Bandyopadhyay A, Bhattacharyya S, Roy S, Majumdar K, Bose K, Boler AK. Cytology  
398 Microarray on Cell Block Preparation: A Novel Diagnostic Approach in Fluid Cytology. *J Cytol*.  
399 Apr-Jun 2019;36(2):79-83.
- 400 **43.** Abe H, Takase Y, Sadashima E, et al. Insulinoma-associated protein 1 is a novel diagnostic  
401 marker of small cell lung cancer in bronchial brushing and cell block cytology from pleural  
402 effusions: Validity and reliability with cutoff value. *Cancer Cytopathol*. Sep  
403 2019;127(9):598-605.
- 404 **44.** Woo CG, Son SM, Han HS, et al. Diagnostic benefits of the combined use of liquid-based  
405 cytology, cell block, and carcinoembryonic antigen immunocytochemistry in malignant  
406 pleural effusion. *J Thorac Dis*. Aug 2018;10(8):4931-4939.
- 407 **45.** Zou L, Ye X, Xu K, Zhu J. Isolation of fetal nucleated red blood cells from maternal blood. *J*  
408 *Tongji Med Univ*. 2000;20(2):169-171.

409

410

411 **Figure legends**

412 **Figure 1. Cellular-level ROI extraction and prediction network.**

413 A. An accurate cell contour at different magnifications. B. Schematic representation  
414 of the framework of the prediction network.

415

416 **Figure 2. HE staining and HbF immunocytochemical staining of fNRBCs.**

417 Panels A and C represented HE staining, while B and D showed cells stained  
418 immunocytochemically with HbF. Panels C and D corresponded to the same sample.

419 The single nucleated cells shown by the arrow in A and B represented fNRBCs.

420

421 **Figure 3. Precision-recall curve of p-net and CNN networks.**

422

423 **Supplementary figure 1. Structure of the CNN model.**



424 **Acknowledgements**

425 This work was supported by the Clinical Research Award of the First Affiliated Hospital of Xi'an  
426 Jiaotong University, China (XJTU1AF-2018-017, XJTU1AF-CRF-2019-002), the Major Basic  
427 Research Project of Natural Science of Shaanxi Provincial Science and Technology Department  
428 (2017ZDJC-11), the Key Research and Development Project of Shaanxi Provincial Science and  
429 Technology Department (2017ZDXM-SF-068, 2019QYPY-138), and Shaanxi Provincial  
430 Collaborative Technology Innovation Project (2017XT-026, 2018XT-002). The funders had no  
431 role in study design, data collection and analysis, decision to publish, or preparation of the  
432 manuscript.

433

434 **Author contributions**

435 Q.L. and D.Z. conceived and designed the study. C.S., L.Z., L.H. and S.M. performed the  
436 laboratory experiments. L.W. finished image acquisition and processing. R.W. analyze and  
437 interpret of data. C.S. and R.W. wrote the first draft of the manuscript. D.L. and X.T. revised the  
438 manuscript.

439

440 **Competing interests**

441 The authors declare no competing interests.

442

443 **Correspondence** and requests for materials should be addressed to Q.L. or D.Z.

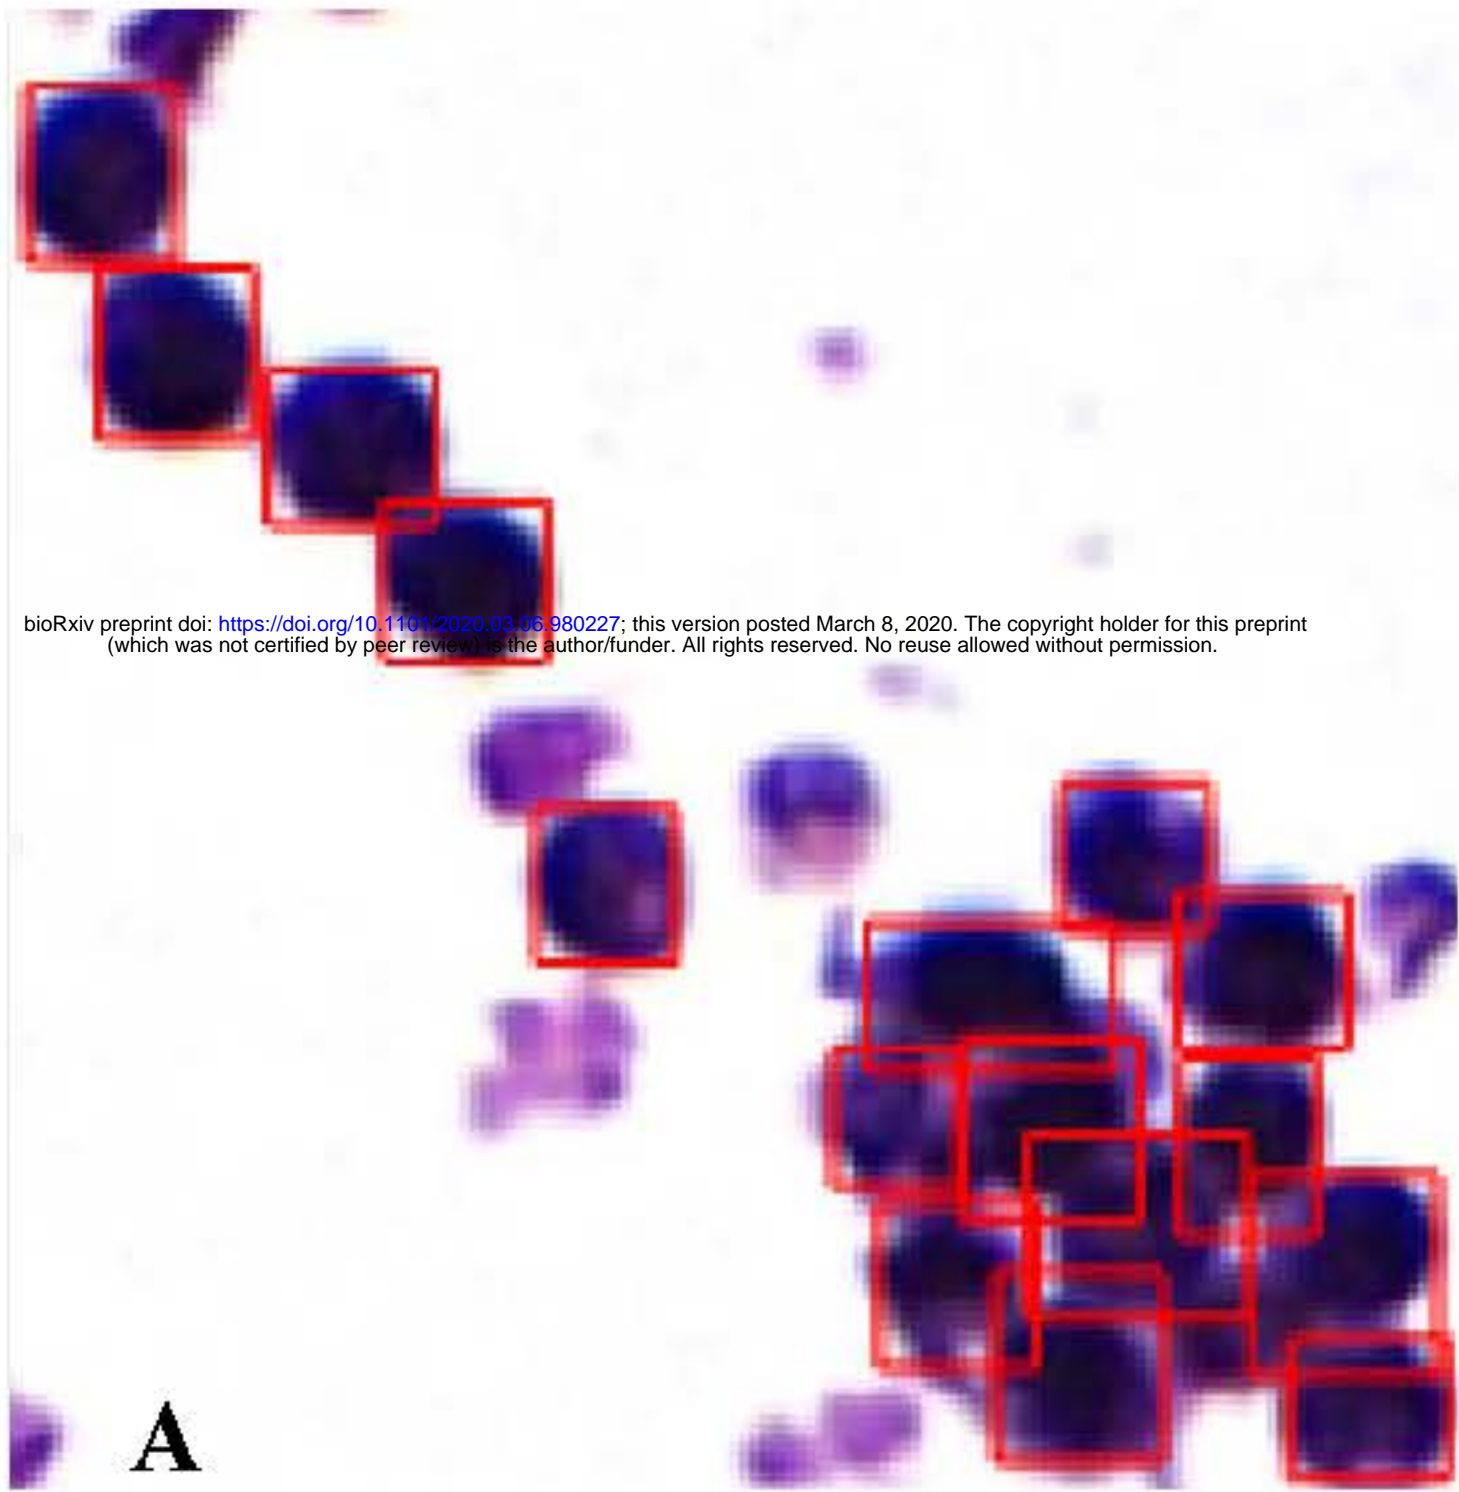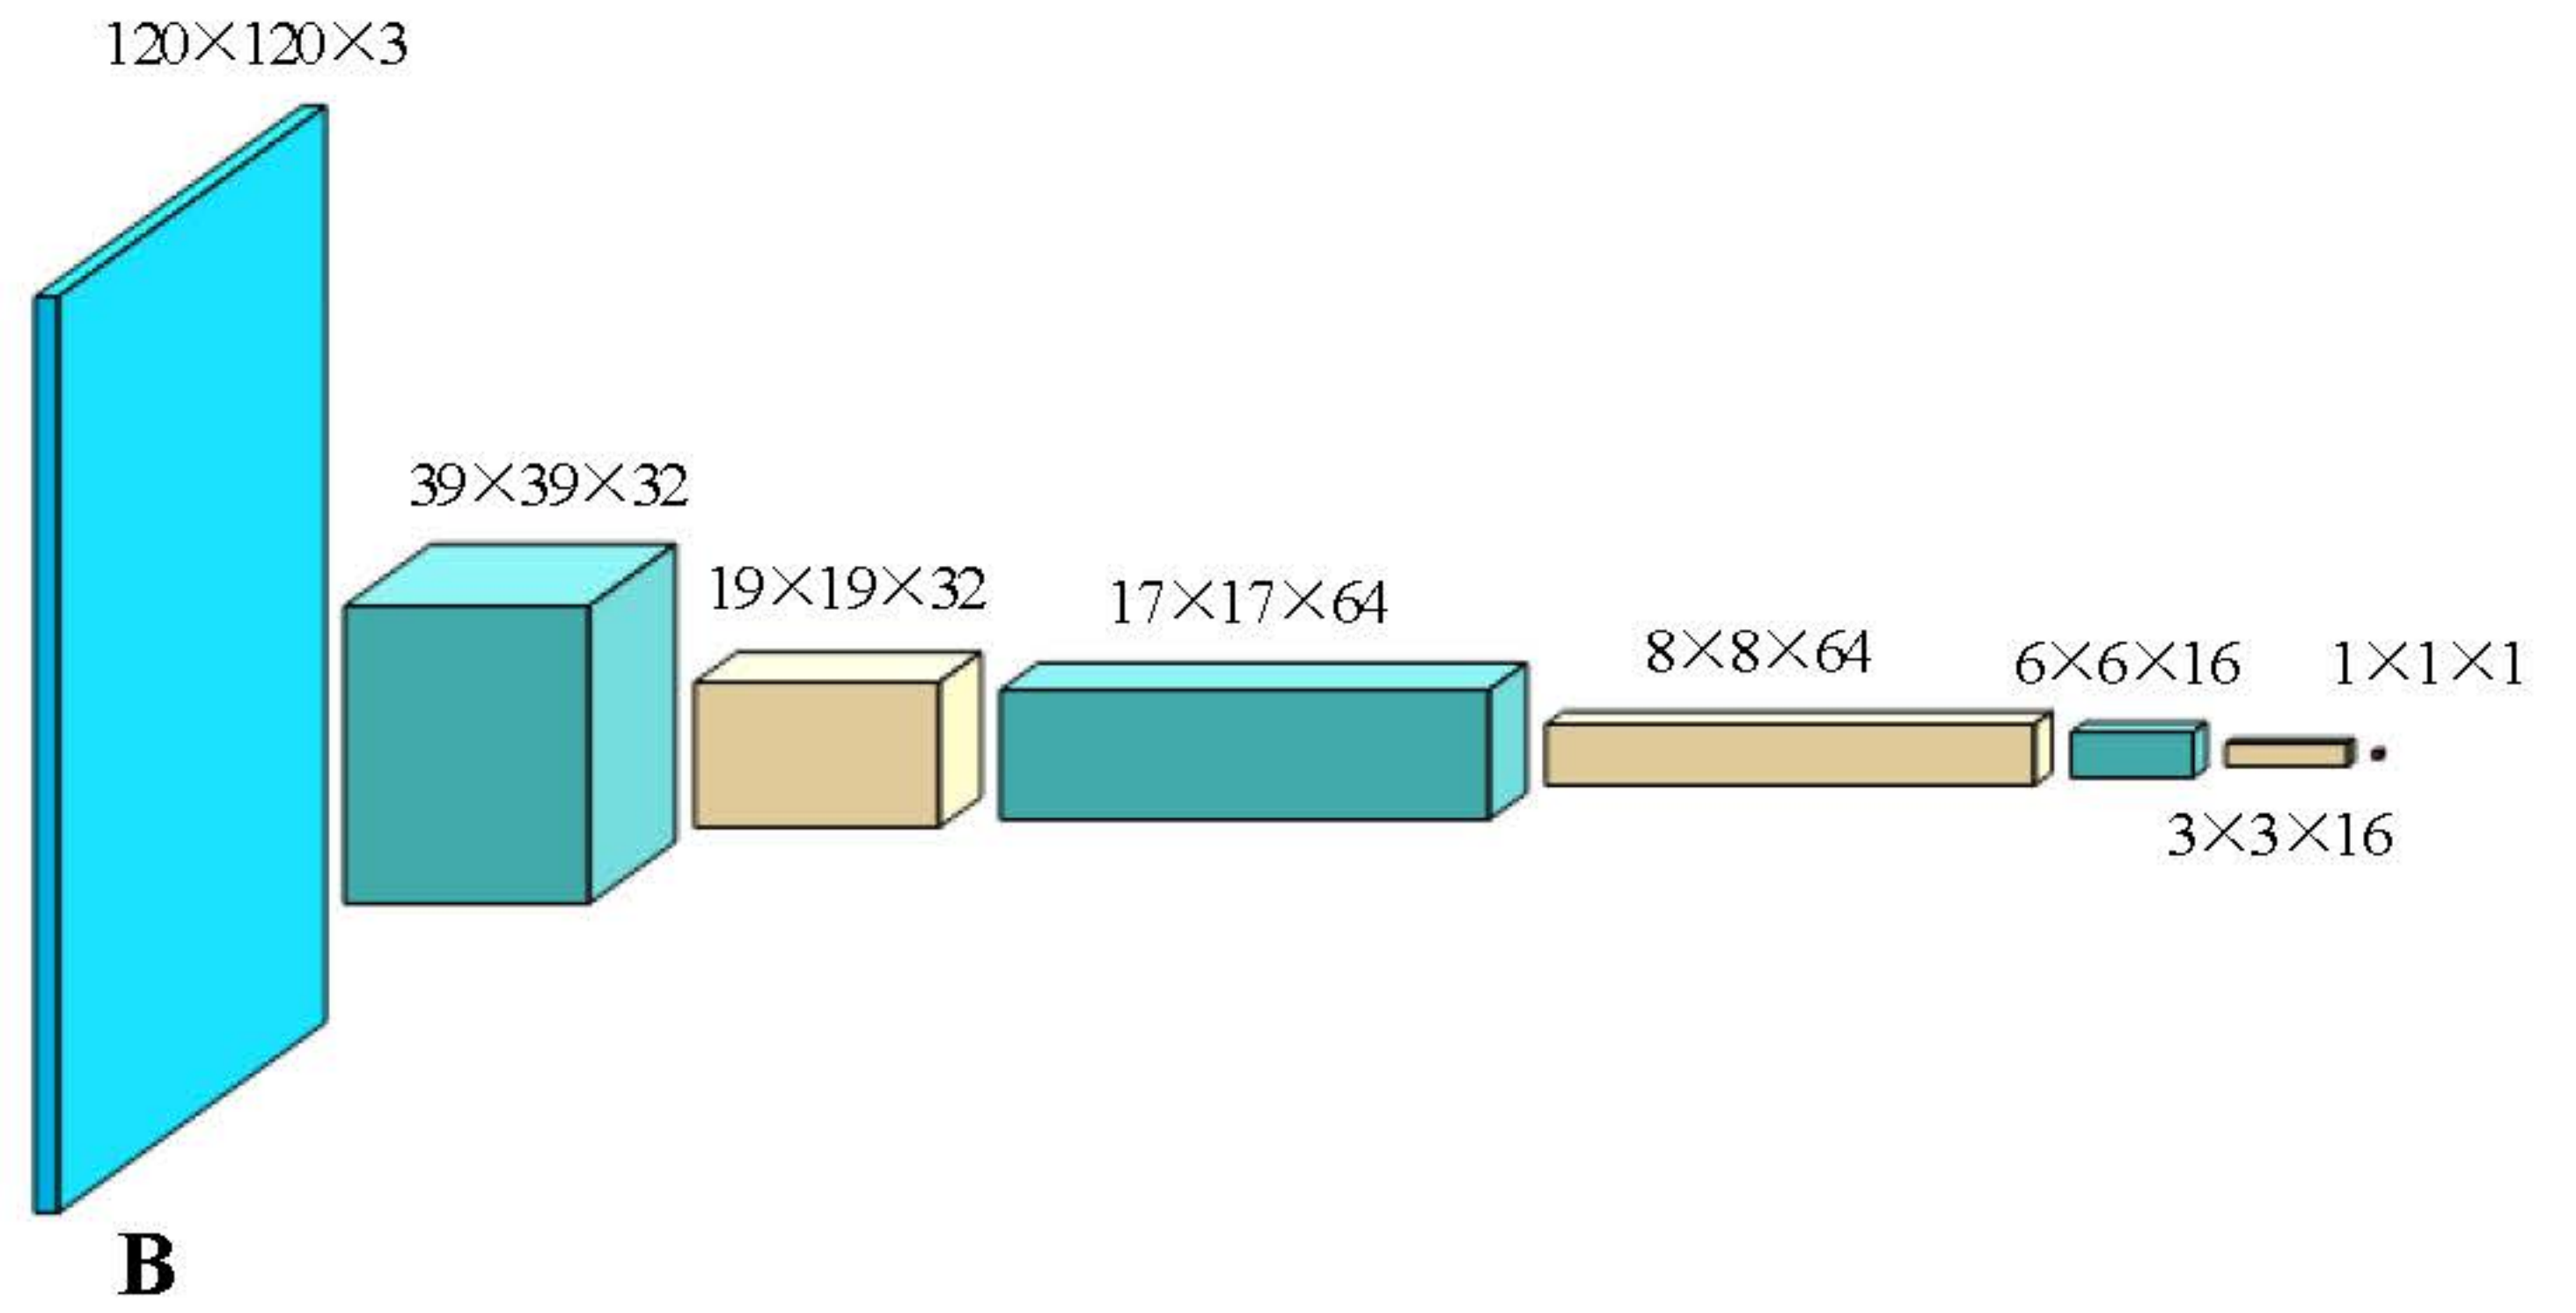

Fig 1. Sun, et al.

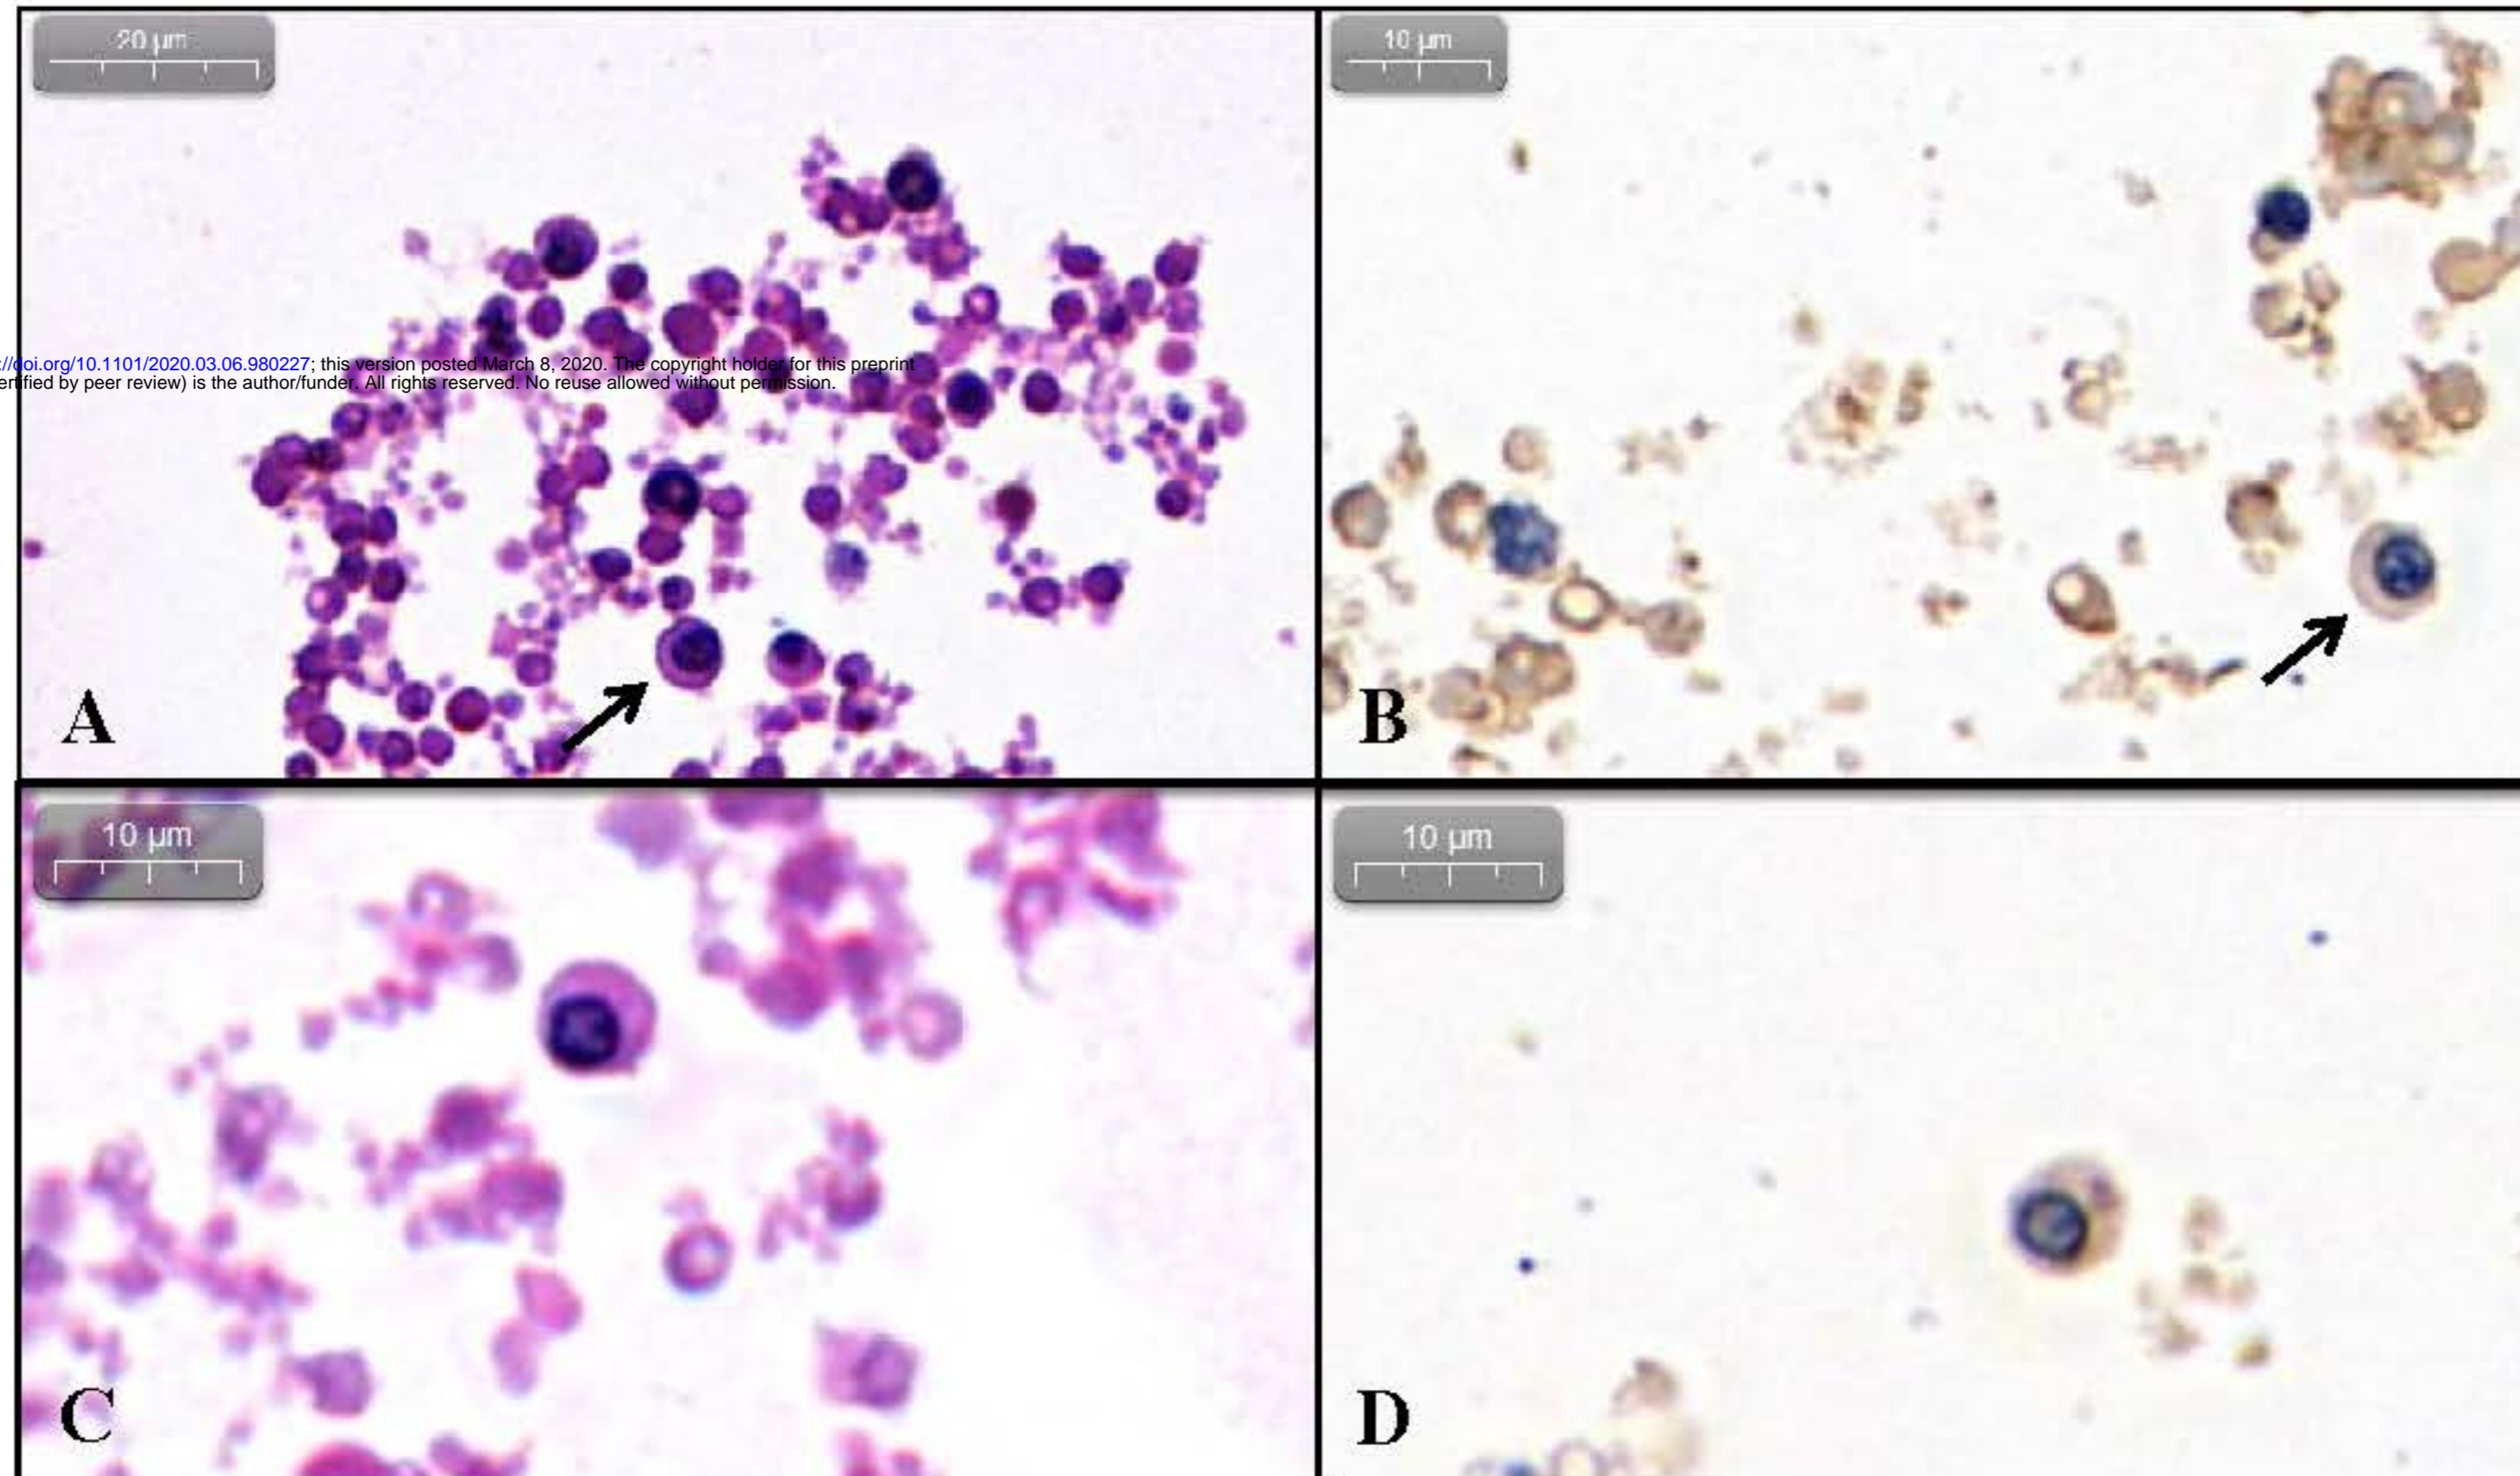

Fig 2. Sun, et al.

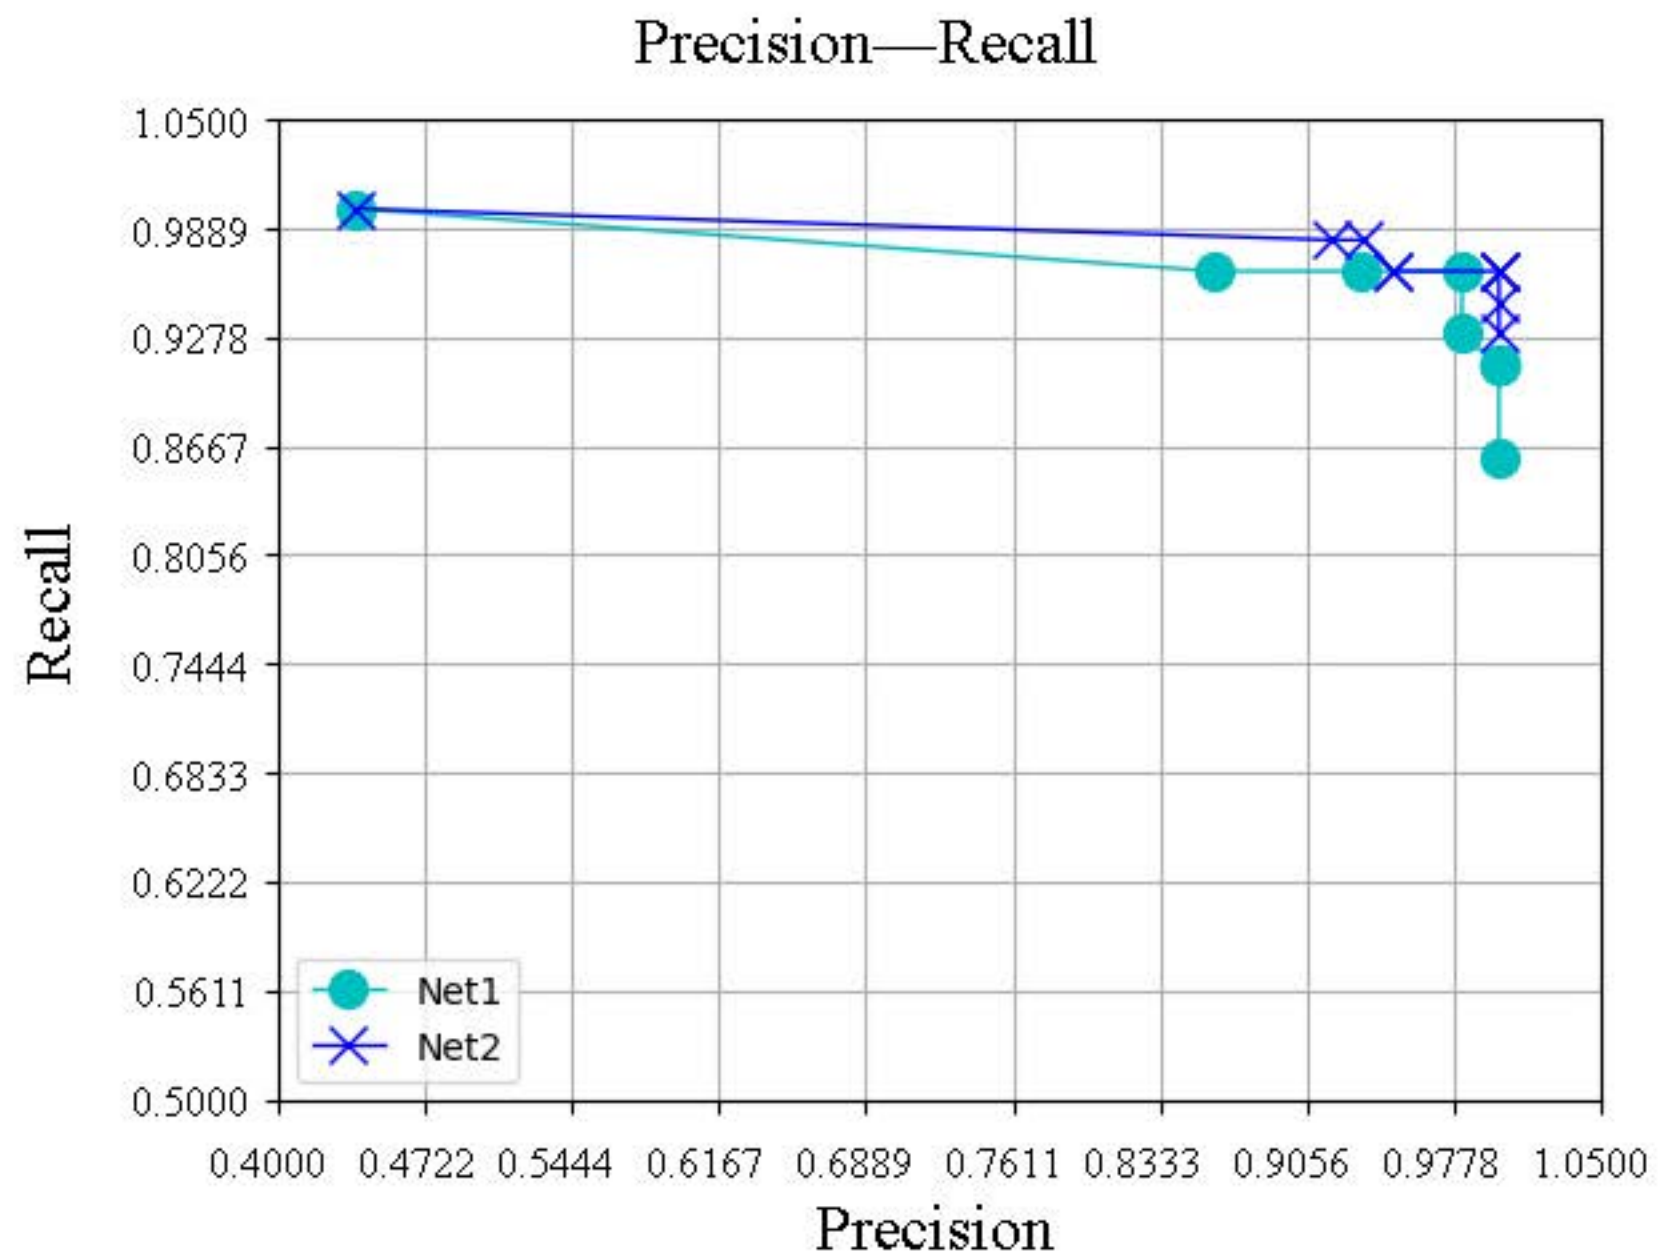

Fig 3. Sun, et al.

| Layer (type)              | OutputShape         | Param # |
|---------------------------|---------------------|---------|
| input_1 (InputLayer)      | (None, 120, 120, 3) | 0       |
| conv1 (Conv2D)            | (None, 39, 39, 32)  | 2432    |
| bn1 (Batch Normalization) | (None, 39, 39, 32)  | 128     |
| activation_1 (Activation) | (None, 39, 39, 32)  | 0       |
| max_pool1 (MaxPooling2D)  | (None, 19, 19, 32)  | 0       |
| conv2 (Conv2D)            | (None, 17, 17, 64)  | 18496   |
| bn2 (Batch Normalization) | (None, 17, 17, 64)  | 256     |
| activation_2 (Activation) | (None, 17, 17, 64)  | 0       |
| max_pool2 (MaxPooling2D)  | (None, 8, 8, 64)    | 0       |
| conv3 (Conv2D)            | (None, 6, 6, 16)    | 9232    |
| bn3 (Batch Normalization) | (None, 6, 6, 16)    | 64      |
| activation_3 (Activation) | (None, 6, 6, 16)    | 0       |
| max_pool3 (MaxPooling2D)  | (None, 3, 3, 16)    | 0       |
| flatten_1 (Flatten)       | (None, 144)         | 0       |
| fc (Dense)                | (None, 1)           | 145     |
| Total params: 30,753      |                     |         |
| Trainable params: 30,529  |                     |         |
| Non-trainable params: 224 |                     |         |

SFig 1. Sun, et al.

Table 1 Demographic data of included women

| Patients | Maternal age (years) | Complication         | Gestational age (weeks) | Birth weight (g) | Sex of the infant |
|----------|----------------------|----------------------|-------------------------|------------------|-------------------|
| 1        | 25                   | Gestational diabetes | 37+1                    | 3320             | male              |
| 2        | 32                   | no                   | 40+4                    | 3660             | male              |
| 3        | 30                   | scar uterus          | 39                      | 3050             | female            |
| 4        | 28                   | no                   | 38+6                    | 3760             | male              |

Table 2 Comparison of results of different schemes

| Scheme variables                   | Recognition rate | Sensitivity | Specificity |
|------------------------------------|------------------|-------------|-------------|
| Sigmoid activation function        | 50%              | 100%        | 0%          |
| The Batch_size parameter is 1      | 79%              | 93%         | 65%         |
| The convolution operators is 5     | 67%              | 83%         | 51%         |
| The output of each layer is pooled | 63%              | 65%         | 62%         |
| Without sample enhancement         | 80%              | 81%         | 79%         |
| Our method                         | 98.5%            | 96.5%       | 100%        |
